# Supplementary material for: Effect of a Second Pregnancy on the HPV Serology in Mothers Followed Up in the Finnish Family HPV Study
Source: MDPI journal article supplement (doi:10.3390/v15102109), 2023-10-18
Supplement: s1 [file s1]

**Supplementary Table S1.** HPV6, HPV11, HPV16, HPV18 and HPV45 serostatus (MFI >200 and MFI >400) during the follow-up, stratified by the 2<sup>nd</sup> pregnancy. Significant differences between groups are bolded.

|                           |     |              | Baseline                      |                               | 12 mo                         |            | 24 mo      |            | 36 mo                         |            |
|---------------------------|-----|--------------|-------------------------------|-------------------------------|-------------------------------|------------|------------|------------|-------------------------------|------------|
| 2 <sup>nd</sup> pregnancy |     |              | MFI > 200                     | MFI > 400                     | MFI > 200                     | MFI > 400  | MFI > 200  | MFI > 400  | MFI > 200                     | MFI > 400  |
|                           |     |              | n (%)                         |                               | n (%)                         |            | n (%)      |            | n (%)                         |            |
| HPV6                      | Yes | Seropositive | <b>40 (44.9)<sup>a</sup></b>  | 29 (32.6)                     | 56 (62.9)                     | 34 (38.2)  | 55 (63.2)  | 37 (42.5)  | 44 (49.4)                     | 37 (41.6)  |
|                           |     | Seronegative | <b>49 (55.1)<sup>a</sup></b>  | 60 (67.4)                     | 33 (37.1)                     | 55 (61.8)  | 32 (36.8)  | 50 (57.5)  | 45 (50.6)                     | 52 (58.4)  |
|                           | No  | Seropositive | <b>139 (58.4)<sup>a</sup></b> | 97 (40.8)                     | 140 (71.8)                    | 97 (49.7)  | 123 (70.3) | 79 (45.1)  | 96 (55.8)                     | 63 (36.6)  |
|                           |     | Seronegative | <b>99 (41.6)<sup>a</sup></b>  | 141 (59.2)                    | 55 (28.2)                     | 98 (50.3)  | 52 (29.7)  | 96 (54.9)  | 76 (44.2)                     | 109 (63.4) |
| HPV11                     | Yes | Seropositive | 13 (14.6)                     | <b>6 (6.7)<sup>b</sup></b>    | 21 (23.6)                     | 9 (10.1)   | 19 (21.8)  | 8 (9.2)    | 12 (13.5)                     | 5 (5.6)    |
|                           |     | Seronegative | 76 (85.4)                     | <b>83 (93.3)<sup>b</sup></b>  | 68 (76.4)                     | 80 (89.9)  | 68 (78.2)  | 79 (90.8)  | 77 (86.5)                     | 84 (94.4)  |
|                           | No  | Seropositive | 57 (23.9)                     | <b>36 (15.1)<sup>b</sup></b>  | 57 (29.2)                     | 31 (15.9)  | 43 (24.6)  | 26 (14.9)  | 27 (15.7)                     | 12 (7.0)   |
|                           |     | Seronegative | 181 (76.1)                    | <b>202 (84.9)<sup>b</sup></b> | 138 (70.8)                    | 164 (84.1) | 132 (75.4) | 149 (85.1) | 145 (84.3)                    | 160 (93.0) |
| HPV16                     | Yes | Seropositive | 28 (31.5)                     | 20 (22.5)                     | 37 (41.6)                     | 25 (28.1)  | 31 (35.6)  | 22 (25.3)  | 25 (28.1)                     | 12 (13.5)  |
|                           |     | Seronegative | 61 (68.5)                     | 69 (77.5)                     | 52 (58.4)                     | 64 (71.9)  | 56 (64.4)  | 65 (74.7)  | 64 (71.9)                     | 77 (86.5)  |
|                           | No  | Seropositive | 81 (34.0)                     | 46 (19.3)                     | 79 (40.5)                     | 48 (24.6)  | 57 (32.6)  | 37 (21.1)  | 49 (28.5)                     | 26 (15.1)  |
|                           |     | Seronegative | 157 (66.0)                    | 192 (80.7)                    | 116 (59.5)                    | 147 (75.4) | 118 (67.4) | 138 (78.9) | 123 (71.5)                    | 146 (84.9) |
| HPV18                     | Yes | Seropositive | <b>10 (11.2)<sup>c</sup></b>  | 3 (3.4)                       | <b>13 (14.6)<sup>d</sup></b>  | 8 (9.0)    | 16 (18.4)  | 8 (9.2)    | <b>14 (15.7)<sup>e</sup></b>  | 8 (9.0)    |
|                           |     | Seronegative | <b>79 (88.8)<sup>c</sup></b>  | 86 (96.6)                     | <b>76 (85.4)<sup>d</sup></b>  | 81 (91.0)  | 71 (81.6)  | 79 (90.8)  | <b>75 (84.3)<sup>e</sup></b>  | 81 (91.0)  |
|                           | No  | Seropositive | <b>56 (23.5)<sup>c</sup></b>  | 23 (9.7)                      | <b>62 (31.8)<sup>d</sup></b>  | 27 (13.8)  | 43 (24.6)  | 25 (14.3)  | <b>47 (27.3)<sup>e</sup></b>  | 27 (15.7)  |
|                           |     | Seronegative | <b>182 (76.5)<sup>c</sup></b> | 215 (90.3)                    | <b>133 (68.2)<sup>d</sup></b> | 168 (86.2) | 132 (75.4) | 150 (85.7) | <b>125 (72.7)<sup>e</sup></b> | 145 (84.3) |
| HPV45                     | Yes | Seropositive | 5 (5.6)                       | 1 (1.1)                       | 8 (9.0)                       | 4 (4.5)    | 9 (10.3)   | 3 (6.3)    | 6 (6.7)                       | 2 (2.2)    |
|                           |     | Seronegative | 84 (94.4)                     | 88 (98.9)                     | 81 (91.0)                     | 85 (95.5)  | 78 (89.7)  | 84 (96.6)  | 83 (93.3)                     | 87 (97.8)  |
|                           | No  | Seropositive | 26 (10.9)                     | 9 (3.8)                       | 24 (12.3)                     | 11 (5.6)   | 15 (8.6)   | 11 (6.3)   | 14 (8.1)                      | 5 (2.9)    |
|                           |     | Seronegative | 212 (89.1)                    | 229 (96.2)                    | 171 (87.7)                    | 184 (94.4) | 160 (91.4) | 164 (93.7) | 158 (91.9)                    | 167 (97.1) |

p-values = <sup>a</sup> 0.034, <sup>b</sup> 0.043, <sup>c</sup> 0.013, <sup>d</sup> 0.002, <sup>e</sup> 0.044

Abbreviations: MFI = mean fluorescence intensity, mo = months

Cut-off value for seropositivity was MFI > 200 or MFI > 400 (stringent)
